# Supplementary material for: Viral dynamics of acute SARS-CoV-2 infection and applications to diagnostic and public health strategies
Source: PubMed Central journal article supplement (PMC8297933; doi:10.1371/journal.pbio.3001333), 2021-07-12
Supplement: pbio.3001333.s001.pdf [file pbio.3001333.s001.pdf]

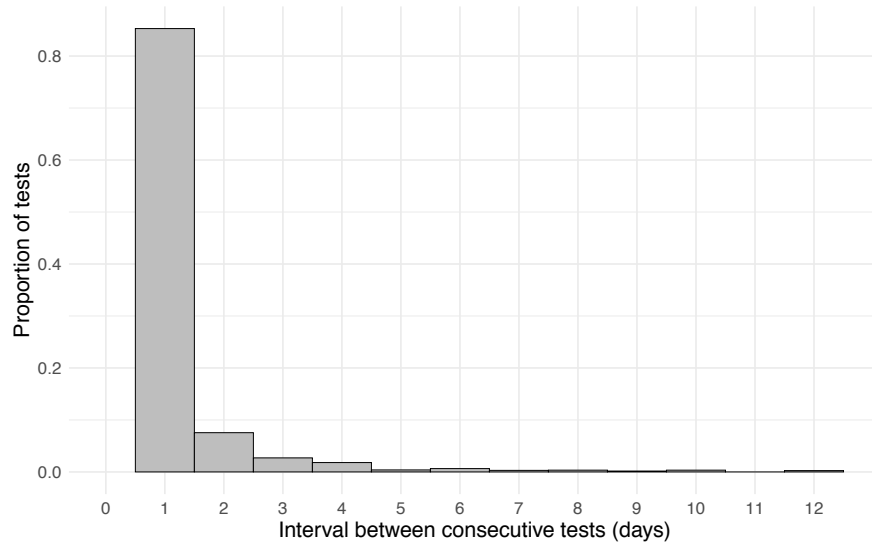

**S1 Fig. Distribution of intervals between consecutive tests.** Histogram of the proportion of consecutive tests that are within  $n$  days of one another up to  $n = 12$  days. Only 12 of 2343 intervals (0.05%) exceeded 12 days. Underlying data are available at [https://github.com/gradlab/CtTrajectories/tree/main/figure\\_data/figS1](https://github.com/gradlab/CtTrajectories/tree/main/figure_data/figS1)<sup>10</sup>
