# Supplementary material for: Viral dynamics of acute SARS-CoV-2 infection and applications to diagnostic and public health strategies
Source: PubMed Central journal article supplement (PMC8297933; doi:10.1371/journal.pbio.3001333), 2021-07-12
Supplement: pbio.3001333.s002.pdf [file pbio.3001333.s002.pdf]

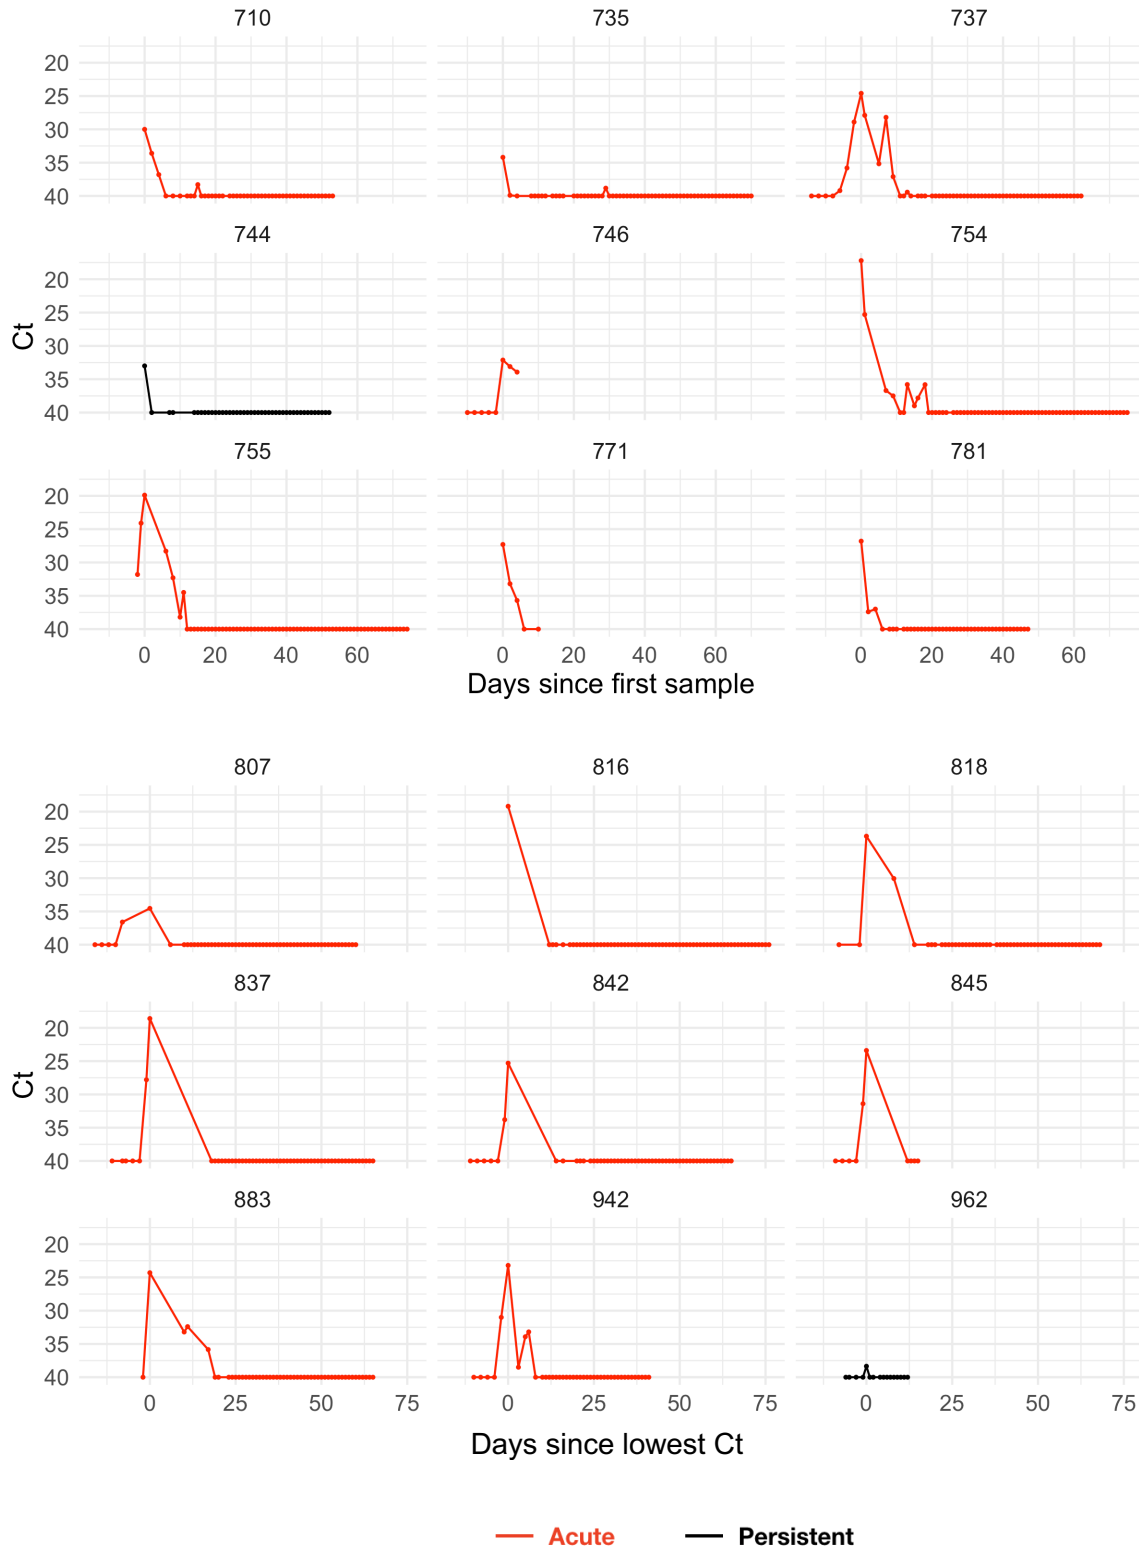

**S2 Fig. Observed Ct values from the study participants (1/4).** Points depict observed Ct values, which are connected with lines to better visualize trends. Individuals with presumed acute infections are marked in red. All others are in black. Underlying data are available at <https://github.com/gradlab/CtTrajectories/tree/main/data><sup>10</sup>
