# Supplementary material for: Viral dynamics of acute SARS-CoV-2 infection and applications to diagnostic and public health strategies
Source: PubMed Central journal article supplement (PMC8297933; doi:10.1371/journal.pbio.3001333), 2021-07-12
Supplement: pbio.3001333.s010.pdf [file pbio.3001333.s010.pdf]

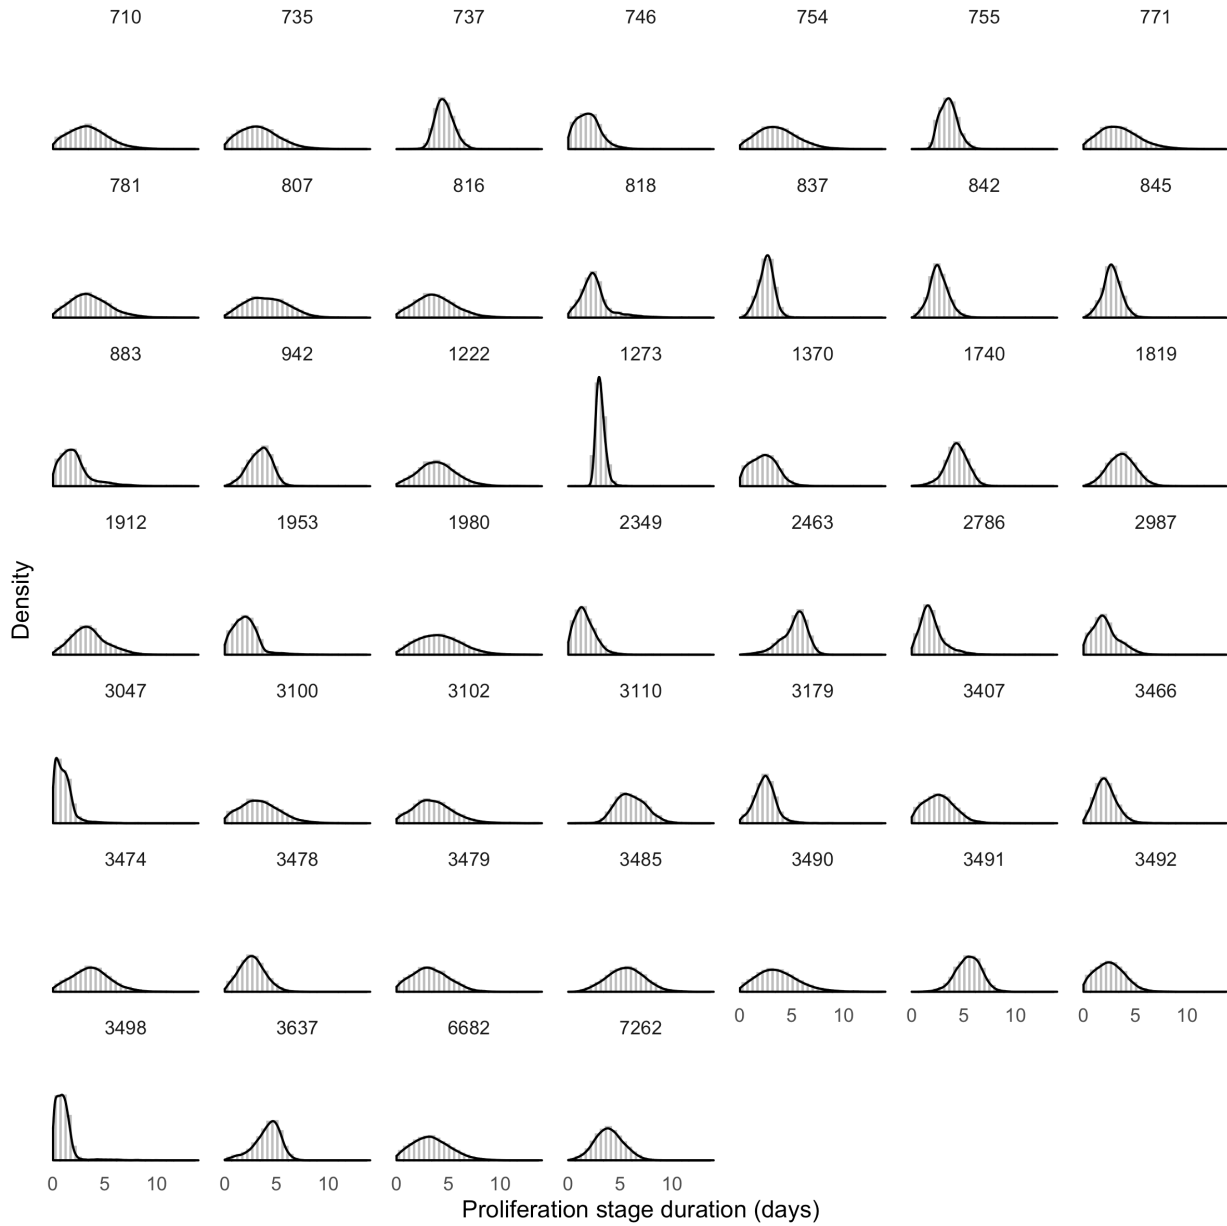

**S10 Fig. Posterior distributions for the duration of the proliferation stage for 46 individuals with acute infections.** Underlying data are available at [https://github.com/gradlab/CtTrajectories/tree/main/output/params\\_df\\_split.csv](https://github.com/gradlab/CtTrajectories/tree/main/output/params_df_split.csv)<sup>10</sup>
