# Supplementary material for: Viral dynamics of acute SARS-CoV-2 infection and applications to diagnostic and public health strategies
Source: PubMed Central journal article supplement (PMC8297933; doi:10.1371/journal.pbio.3001333), 2021-07-12
Supplement: pbio.3001333.s014.pdf [file pbio.3001333.s014.pdf]

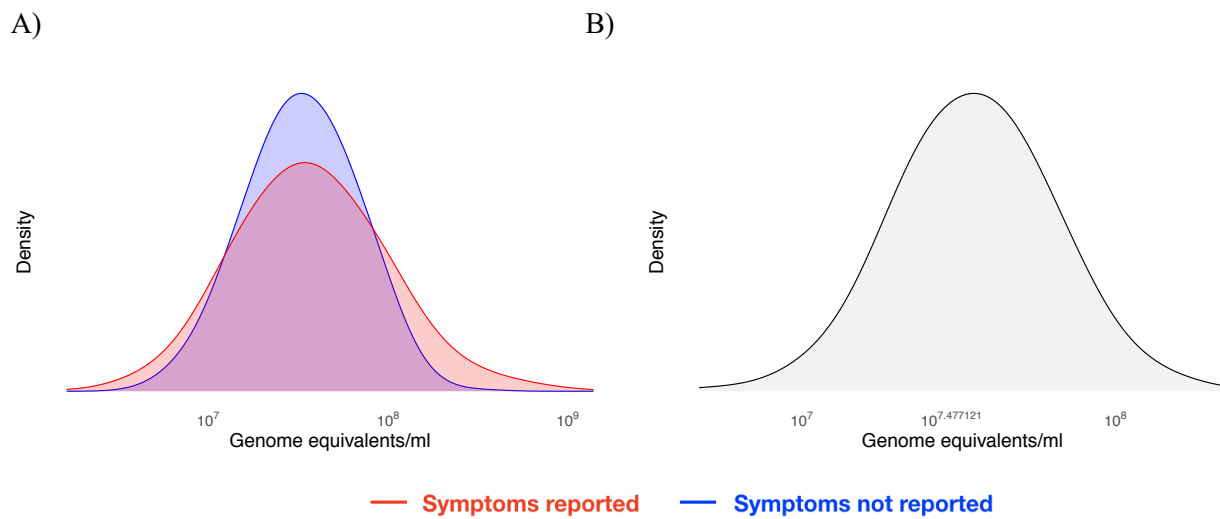

**S14 Fig. Peak viral concentration and overall posterior viral concentration trajectories in terms of genome equivalents per ml.** Posterior peak viral concentration distribution for symptomatic (red) and asymptomatic (blue) individuals (A) and for all individuals combined (B). Underlying data are available at [https://github.com/gradlab/CtTrajectories/tree/main/output/params\\_df\\_split.csv](https://github.com/gradlab/CtTrajectories/tree/main/output/params_df_split.csv)<sup>10</sup> (A) and [https://github.com/gradlab/CtTrajectories/tree/main/output/params\\_df\\_combined.csv](https://github.com/gradlab/CtTrajectories/tree/main/output/params_df_combined.csv)<sup>10</sup> (B)
