# Supplementary material for: Viral dynamics of acute SARS-CoV-2 infection and applications to diagnostic and public health strategies
Source: PubMed Central journal article supplement (PMC8297933; doi:10.1371/journal.pbio.3001333), 2021-07-12
Supplement: pbio.3001333.s015.pdf [file pbio.3001333.s015.pdf]

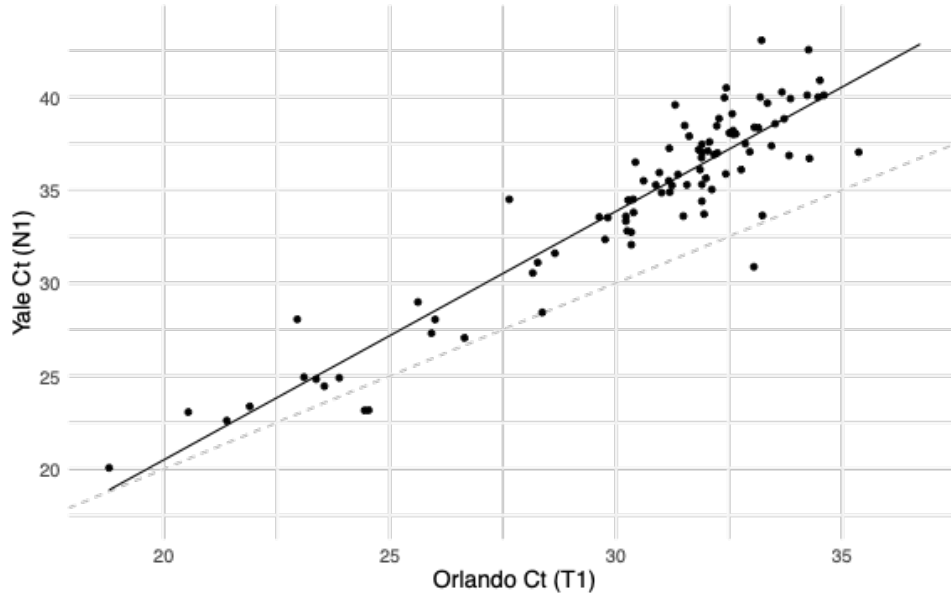

**S15 Fig. Ct values from the Yale and Florida labs.** Points depict the Ct values for SARS-CoV-2 nasal swab samples that were tested in both Florida and Yale labs. Ct values from Florida represent Target 1 (ORF1ab) on the Roche cobas system, and Ct values from Yale represent N1 in the Yale multiplex assay. The solid black line depicts the best-fit linear regression (intercept =  $-6.25$ , slope =  $1.34$ ,  $R^2 = 0.86$ ). The dashed black line marks the 1-1 line where the points would be expected to fall if the two labs were identical. Underlying data are available at [https://github.com/gradlab/CtTrajectories/tree/main/figure\\_data/figS15](https://github.com/gradlab/CtTrajectories/tree/main/figure_data/figS15)<sup>10</sup>
