# Supplementary material for: Viral dynamics of acute SARS-CoV-2 infection and applications to diagnostic and public health strategies
Source: PubMed Central journal article supplement (PMC8297933; doi:10.1371/journal.pbio.3001333), 2021-07-12
Supplement: pbio.3001333.s016.pdf [file pbio.3001333.s016.pdf]

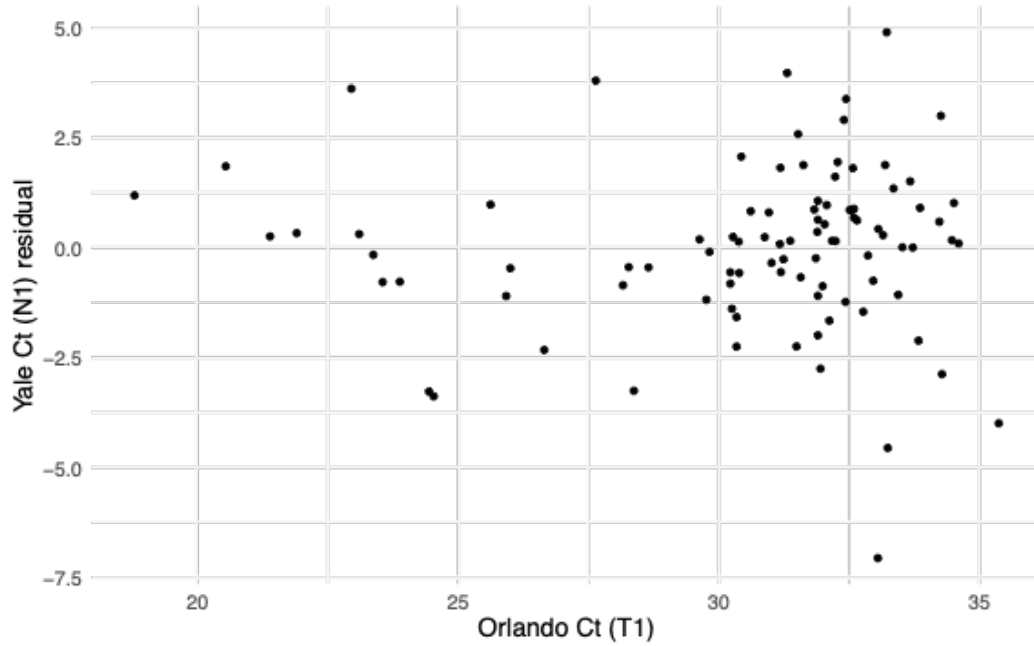

**S16 Fig. Residuals from the Yale/Florida Ct regression.** Points depict the residual after removing the best-fit linear trend in the relationship between the Yale and Florida Ct values. Underlying data are available at

[https://github.com/gradlab/CtTrajectories/tree/main/figure\\_data/figS16](https://github.com/gradlab/CtTrajectories/tree/main/figure_data/figS16)<sup>10</sup>
