# Supplementary material for: Viral dynamics of acute SARS-CoV-2 infection and applications to diagnostic and public health strategies
Source: PubMed Central journal article supplement (PMC8297933; doi:10.1371/journal.pbio.3001333), 2021-07-12
Supplement: pbio.3001333.s017.pdf [file pbio.3001333.s017.pdf]

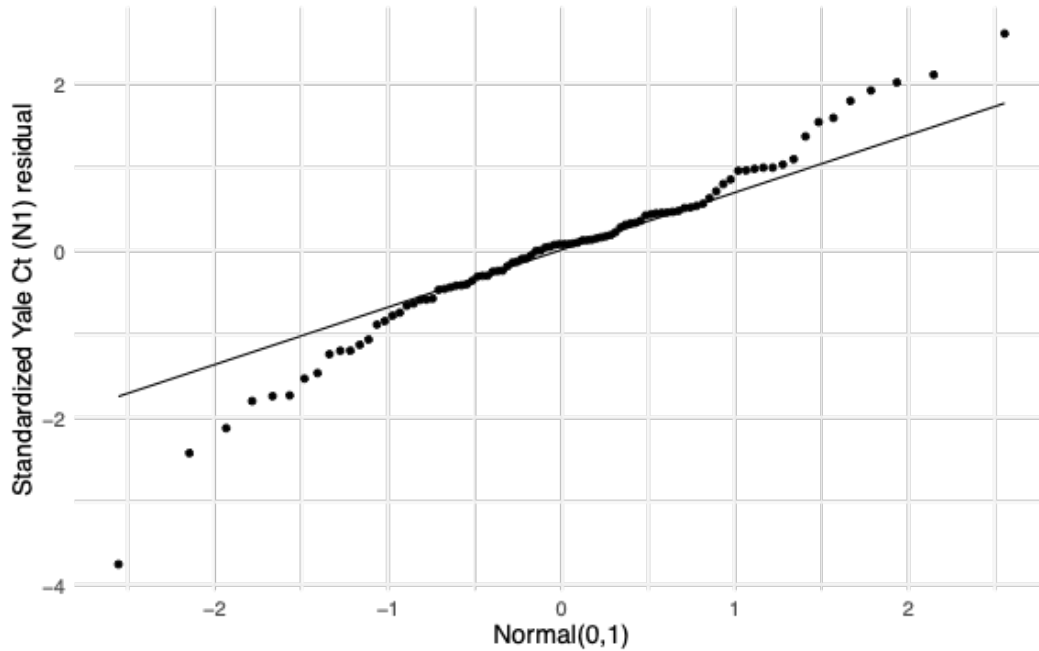

**S17 Fig. QQ plot of the residuals from the Yale/Florida Ct regression.** The residuals were standardized (subtracted the mean and divided by the standard deviation) before comparing with the theoretical quantiles of a normal distribution with mean 0 and standard deviation 1. The points depict the empirical quantiles of the data points and the line depicts the where the points would be expected to fall if they were drawn from a standard normal distribution. Underlying data are available at

[https://github.com/gradlab/CtTrajectories/tree/main/figure\\_data/FigS17](https://github.com/gradlab/CtTrajectories/tree/main/figure_data/FigS17)<sup>10</sup>
