# Supplementary material for: Viral dynamics of acute SARS-CoV-2 infection and applications to diagnostic and public health strategies
Source: PubMed Central journal article supplement (PMC8297933; doi:10.1371/journal.pbio.3001333), 2021-07-12
Supplement: pbio.3001333.s020.pdf [file pbio.3001333.s020.pdf]

**S1 Table. Standard curve relationship between genome equivalents and Ct values.** Synthetic T7 RNA transcripts corresponding to a 1,363 base pair segment of the SARS-CoV-2 nucleocapsid gene were serially diluted from  $10^6$ - $10^0$  and evaluated in duplicate with RT-qPCR. The best-fit linear regression of the average Ct on the log<sub>10</sub>-transformed standard values had slope -3.60971 and intercept 40.93733 ( $R^2 = 0.99$ ).

| Standard (GE/ul) | Replicate 1 (Ct) | Replicate 2 (Ct) | Average Ct |
|------------------|------------------|------------------|------------|
| $10^6$           | 19.3             | 19.7             | 19.5       |
| $10^5$           | 23.0             | 21.2             | 22.1       |
| $10^4$           | 26.9             | 26.7             | 26.8       |
| $10^3$           | 30.6             | 30.4             | 30.5       |
| $10^2$           | 34.0             | 34.0             | 34.0       |
| $10^1$           | 37.2             | 36.6             | 36.9       |
| $10^0$           | N/A              | 39.9             | 39.9       |
