# Supplementary material for: Viral dynamics of acute SARS-CoV-2 infection and applications to diagnostic and public health strategies
Source: PubMed Central journal article supplement (PMC8297933; doi:10.1371/journal.pbio.3001333), 2021-07-12
Supplement: pbio.3001333.s021.pdf [file pbio.3001333.s021.pdf]

**S2 Table. Viral dynamic parameters for sensitivity analysis 1, omitting person 3047**

| <b>Parameter</b>                                | <b>Mean, symptoms [95% CI]</b> | <b>Mean, no symptoms [95% CI]</b> |
|-------------------------------------------------|--------------------------------|-----------------------------------|
| Peak Ct                                         | 22.3 [19.4, 25.1]              | 22.2 [20, 24.3]                   |
| Peak viral concentration<br>(RNA copies/ml/day) | 7.6 [6.8, 8.4]                 | 7.6 [7, 8.2]                      |
| Proliferation duration<br>(days)                | 3.3 [2, 4.9]                   | 3.6 [2.7, 4.7]                    |
| Proliferation rate<br>(Ct/day)                  | 5.7 [3.5, 9.2]                 | 5.1 [3.7, 6.8]                    |
| Proliferation rate<br>(RNA copies/ml/day)       | 1.6 [1, 2.6]                   | 1.4 [1, 1.9]                      |
| Clearance duration<br>(days)                    | 11.1 [8.2, 14.1]               | 8.0 [6.3, 9.9]                    |
| Clearance rate<br>(Ct/day)                      | 1.6 [1.2, 2.3]                 | 2.2 [1.7, 2.9]                    |
| Clearance rate<br>(RNA copies/ml/day)           | 0.5 [0.3, 0.6]                 | 0.6 [0.5, 0.8]                    |
| Infection duration<br>(days)                    | 14.3 [11.3, 17.5]              | 11.6 [9.7, 13.6]                  |
