# Supplementary material for: Viral dynamics of acute SARS-CoV-2 infection and applications to diagnostic and public health strategies
Source: PubMed Central journal article supplement (PMC8297933; doi:10.1371/journal.pbio.3001333), 2021-07-12
Supplement: pbio.3001333.s022.pdf [file pbio.3001333.s022.pdf]

**S3 Table. Viral dynamic parameters for sensitivity analysis 2, assuming 95% PCR sensitivity or 5% probability of false negative.**

| <b>Parameter</b>                                | <b>Mean, symptoms [95% CI]</b> | <b>Mean, no symptoms [95% CI]</b> |
|-------------------------------------------------|--------------------------------|-----------------------------------|
| Peak Ct                                         | 22.2 [19.1, 25.1]              | 22.4 [20.1, 24.7]                 |
| Peak viral concentration<br>(RNA copies/ml/day) | 7.6 [6.8, 8.4]                 | 7.6 [7, 8.2]                      |
| Proliferation duration<br>(days)                | 3.8 [2, 5.9]                   | 3.7 [2.7, 4.8]                    |
| Proliferation rate<br>(Ct/day)                  | 5.1 [2.9, 9.2]                 | 4.9 [3.5, 6.6]                    |
| Proliferation rate<br>(RNA copies/ml/day)       | 1.6 [1, 2.6]                   | 1.4 [1, 1.9]                      |
| Clearance duration<br>(days)                    | 10.7 [7.7, 13.9]               | 7.9 [6.1, 9.8]                    |
| Clearance rate<br>(Ct/day)                      | 1.7 [1.2, 2.4]                 | 2.3 [1.7, 3]                      |
| Clearance rate<br>(RNA copies/ml/day)           | 0.5 [0.3, 0.6]                 | 0.6 [0.5, 0.8]                    |
| Infection duration<br>(days)                    | 14.5 [11.2, 17.8]              | 11.6 [9.6, 13.7]                  |
