# Supplementary material for: Viral dynamics of acute SARS-CoV-2 infection and applications to diagnostic and public health strategies
Source: PubMed Central journal article supplement (PMC8297933; doi:10.1371/journal.pbio.3001333), 2021-07-12
Supplement: pbio.3001333.s023.pdf [file pbio.3001333.s023.pdf]

**S4 Table. Viral dynamic parameters for sensitivity analysis 3, removing upper bounds for proliferation and clearance times.**

| <b>Parameter</b>                                | <b>Mean, symptoms [95% CI]</b> | <b>Mean, no symptoms [95% CI]</b> |
|-------------------------------------------------|--------------------------------|-----------------------------------|
| Peak Ct                                         | 22.3 [19.1, 25.1]              | 22.4 [20.2, 24.6]                 |
| Peak viral concentration<br>(RNA copies/ml/day) | 7.6 [6.8, 8.4]                 | 7.5 [6.9, 8.1]                    |
| Proliferation duration<br>(days)                | 3.4 [2.1, 5.2]                 | 3.5 [2.5, 4.5]                    |
| Proliferation rate<br>(Ct/day)                  | 5.4 [3.3, 8.8]                 | 5.2 [3.7, 7.1]                    |
| Proliferation rate<br>(RNA copies/ml/day)       | 1.5 [0.9, 2.4]                 | 1.4 [1, 2]                        |
| Clearance duration<br>(days)                    | 10.8 [7.7, 14.1]               | 7.8 [6.1, 9.8]                    |
| Clearance rate<br>(Ct/day)                      | 1.7 [1.2, 2.4]                 | 2.3 [1.7, 3.0]                    |
| Clearance rate<br>(RNA copies/ml/day)           | 0.5 [0.3, 0.7]                 | 0.6 [0.5, 0.8]                    |
| Infection duration<br>(days)                    | 14.3 [11.1, 17.7]              | 11.3 [9.3, 13.4]                  |
