# Supplementary material for: Viral dynamics of acute SARS-CoV-2 infection and applications to diagnostic and public health strategies
Source: PubMed Central journal article supplement (PMC8297933; doi:10.1371/journal.pbio.3001333), 2021-07-12
Supplement: pbio.3001333.s024.pdf [file pbio.3001333.s024.pdf]

**S5 Table. Viral dynamic parameters for sensitivity analysis 4, using “low” priors for the proliferation and clearance times (mean 3.5 and 7.5 days, respectively).**

| <b>Parameter</b>                             | <b>Mean, symptoms [95% CI]</b> | <b>Mean, no symptoms [95% CI]</b> |
|----------------------------------------------|--------------------------------|-----------------------------------|
| Peak Ct                                      | 22.2 [19, 25.1]                | 22.4 [20.2, 24.6]                 |
| Peak viral concentration (RNA copies/ml/day) | 7.6 [6.8, 8.5]                 | 7.5 [6.9, 8.1]                    |
| Proliferation duration (days)                | 3.1 [1.9, 4.6]                 | 3.2 [2.3, 4.2]                    |
| Proliferation rate (Ct/day)                  | 6.1 [3.7, 9.8]                 | 5.6 [4, 7.6]                      |
| Proliferation rate (RNA copies/ml/day)       | 1.7 [1, 2.7]                   | 1.5 [1.1, 2.1]                    |
| Clearance duration (days)                    | 10.0 [6.9, 13.2]               | 7.5 [5.8, 9.4]                    |
| Clearance rate (Ct/day)                      | 1.8 [1.3, 2.7]                 | 2.4 [1.8, 3.1]                    |
| Clearance rate (RNA copies/ml/day)           | 0.5 [0.4, 0.8]                 | 0.7 [0.5, 0.9]                    |
| Infection duration (days)                    | 13.1 [9.9, 16.4]               | 10.8 [8.9, 12.8]                  |
