# Supplementary material for: Viral dynamics of acute SARS-CoV-2 infection and applications to diagnostic and public health strategies
Source: PubMed Central journal article supplement (PMC8297933; doi:10.1371/journal.pbio.3001333), 2021-07-12
Supplement: pbio.3001333.s025.pdf [file pbio.3001333.s025.pdf]

**S6 Table. Viral dynamic parameters for sensitivity analysis 5, using “high” priors for the proliferation and clearance times (mean 10.5 days and 22.5 days, respectively)**

| <b>Parameter</b>                             | <b>Mean, symptoms [95% CI]</b> | <b>Mean, no symptoms [95% CI]</b> |
|----------------------------------------------|--------------------------------|-----------------------------------|
| Peak Ct                                      | 22.3 [19.2, 25.2]              | 22.3 [20.2, 24.4]                 |
| Peak viral concentration (RNA copies/ml/day) | 7.6 [6.8, 8.4]                 | 7.5 [7, 8.1]                      |
| Proliferation duration (days)                | 3.7 [2.2, 5.4]                 | 3.6 [2.7, 4.7]                    |
| Proliferation rate (Ct/day)                  | 5.1 [3.1, 8.3]                 | 5.0 [3.6, 6.8]                    |
| Proliferation rate (RNA copies/ml/day)       | 1.4 [0.9, 2.3]                 | 1.4 [1, 1.9]                      |
| Clearance duration (days)                    | 11.6 [8.5, 14.7]               | 8.0 [6.3, 10]                     |
| Clearance rate (Ct/day)                      | 1.6 [1.1, 2.2]                 | 2.2 [1.7, 2.9]                    |
| Clearance rate (RNA copies/ml/day)           | 0.4 [0.3, 0.6]                 | 0.6 [0.5, 0.8]                    |
| Infection duration (days)                    | 15.2 [12, 18.7]                | 11.6 [9.7, 13.7]                  |
